# Supplementary material for: Development of a simple and stability-indicating RP-HPLC method for determining olanzapine and related impurities generated in the preparative process
Source: Royal Society of Chemistry journal article supplement (doi:10.1039/c1an15155j), 2011-01-01
Supplement: c1an15155j.pdf [file c1an15155j.pdf]

Electronic Supplementary Information

**“Development of a simple and stability-indicating RP-HPLC method for determining olanzapine and related impurities generated in the preparative process”**

**Daoping Cui, Yueqing Li, Mingming Lian, Feng Yang and Qingwei Meng\***

*<sup>a</sup>State Key Laboratory of Fine Chemicals, School of Pharmaceutical Science and Technology, Dalian University of Technology, No.2 Linggong Road, Ganjingzi District, Dalian, Liaoning Province, 116024, P. R. China; <sup>b</sup>Merro Pharmaceutical Companies, No.9 Yingsheng Road, Ganjingzi District, Dalian, Liaoning Province, 116036, P. R. China*

Corresponding author: Qingwei Meng

E-mail: [mengqw@dlut.edu.cn](mailto:mengqw@dlut.edu.cn)

**Contents**

1. X-ray crystallographic data table of Imp-7
2. Preparation/separation of Imp-1~ -8
3. Spectra of Imp-1~ -8
4. Linear analysis of OLN and impurities
5. References

## 1. X-ray crystallographic data table of Imp-7

### (1-(5-methyl-thiophen-2-yl)-1H-benzimidazol-2(3H)-one)

The recrystallization mother liquor of OLN was concentrated under high vacuum to obtain dark brown crude samples. By column chromatograph (the mobile phase consisting of CH<sub>2</sub>Cl<sub>2</sub>: methanol: Et<sub>2</sub>NH), each fraction was collected and analyzed. The fractions of Imp-7 were concentrated to white powder. Transparent acicular single crystals were obtained by crystallizing from ethanol at room temperature (13~20°C) through natural evaporation.

**Table 1** X-ray crystallographic data processing and refinement statistics for Imp-7

|                                                  |                                                   |
|--------------------------------------------------|---------------------------------------------------|
| Empirical formula                                | C <sub>12</sub> H <sub>10</sub> N <sub>2</sub> OS |
| Formula weight                                   | 230.28                                            |
| Temperature(K)                                   | 298                                               |
| Wavelength(Å)                                    | 0.71073                                           |
| Crystal system                                   | Monoclinic                                        |
| Space group                                      | P2(1)/n                                           |
| a(Å)                                             | 20.459(11)                                        |
| b(Å)                                             | 9.635(5)                                          |
| c(Å)                                             | 23.657(12)                                        |
| α (°)                                            | 90.00                                             |
| β (°)                                            | 111.067(6)                                        |
| γ (°)                                            | 90.00                                             |
| V (Å <sup>3</sup> )                              | 4352(4)                                           |
| Z                                                | 16                                                |
| D <sub>calcd</sub> (g/cm <sup>-3</sup> )         | 1.406                                             |
| Absorption coefficient(mm <sup>-1</sup> )        | 0.275                                             |
| F(000)                                           | 1920                                              |
| Crystal size(mm)                                 | 0.30×0.16×0.11                                    |
| θ Range for data collection(°)                   | 2.27-26.71                                        |
| Limiting indices                                 | -26 ≤ h ≤ 26, -7 ≤ k ≤ 12, -30 ≤ l ≤ 25           |
| Reflections collected/unique                     | 23289/9592 [R <sub>int</sub> =0.05]               |
| Completeness 2θ= 50.00(%)                        | 0.968                                             |
| Refinement method                                | Full-matrix least-squares on F <sup>2</sup>       |
| Data / restraints / parameters                   | 9592 / 0 / 577                                    |
| Goodness of fit on F <sup>2</sup>                | 1.01                                              |
| Final R indices (I > 2σ(I))                      | R <sub>1</sub> =0.063, wR <sub>2</sub> =0.1616    |
| R indices (all data)                             | R <sub>1</sub> =0.1111, wR <sub>2</sub> =0.1982   |
| Largest diff. Peak and hole (e Å <sup>-3</sup> ) | 0.39 and -0.71                                    |

**Table 2** Fractional atomic coordinates and isotropic or equivalent isotropic displacement parameters ( $\text{\AA}^2$ ) for compound Imp-7

| Atom | <i>x</i>      | <i>y</i>    | <i>z</i>      | $U_{\text{iso}}^*/U_{\text{eq}}$ |
|------|---------------|-------------|---------------|----------------------------------|
| S1   | 0.59800 (5)   | 0.56901 (8) | 0.22074 (3)   | 0.0528 (2)                       |
| O1   | 0.52039 (10)  | 0.2539 (2)  | 0.08870 (8)   | 0.0477 (5)                       |
| N1   | 0.60523 (12)  | 0.4277 (2)  | 0.12298 (9)   | 0.0369 (5)                       |
| C1   | 0.55805 (14)  | 0.3429 (3)  | 0.07914 (11)  | 0.0368 (7)                       |
| N2   | 0.56367 (12)  | 0.3778 (2)  | 0.02535 (9)   | 0.0392 (6)                       |
| H2A  | 0.5401        | 0.3403      | -0.0089       | 0.047*                           |
| C2   | 0.61257 (14)  | 0.4822 (3)  | 0.03353 (12)  | 0.0347 (6)                       |
| S2   | 0.09460 (4)   | 0.17875 (8) | 0.21701 (3)   | 0.0502 (2)                       |
| O2   | 0.01819 (11)  | 0.4941 (2)  | 0.08419 (8)   | 0.0480 (5)                       |
| C3   | 0.63612 (15)  | 0.5493 (3)  | -0.00759 (13) | 0.0441 (7)                       |
| H3   | 0.6185        | 0.5271      | -0.0486       | 0.053*                           |
| S3   | -0.04842 (4)  | 0.45151 (9) | 0.30116 (3)   | 0.0430 (2)                       |
| O3   | -0.01924 (10) | 0.2651 (2)  | 0.42126 (8)   | 0.0446 (5)                       |
| N3   | 0.10318 (12)  | 0.3207 (2)  | 0.11982 (9)   | 0.0382 (6)                       |
| S4   | 0.44895 (4)   | 0.29818 (9) | 0.29682 (3)   | 0.0436 (2)                       |
| O4   | 0.47929 (10)  | 0.4863 (2)  | 0.41627 (8)   | 0.0448 (5)                       |
| C4   | 0.68700 (16)  | 0.6509 (3)  | 0.01517 (14)  | 0.0482 (8)                       |
| H4   | 0.7037        | 0.6978      | -0.0112       | 0.058*                           |
| N4   | 0.06361 (12)  | 0.3702 (2)  | 0.02244 (9)   | 0.0388 (6)                       |
| H4A  | 0.0403        | 0.4071      | -0.0120       | 0.047*                           |
| C5   | 0.71329 (15)  | 0.6840 (3)  | 0.07590 (14)  | 0.0467 (7)                       |
| H5   | 0.7475        | 0.7523      | 0.0896        | 0.056*                           |
| N5   | -0.10726 (11) | 0.4322 (2)  | 0.38763 (9)   | 0.0352 (5)                       |
| C6   | 0.68964 (14)  | 0.6171 (3)  | 0.11717 (12)  | 0.0414 (7)                       |
| H6   | 0.7071        | 0.6399      | 0.1581        | 0.050*                           |
| N6   | -0.06287 (12) | 0.3862 (2)  | 0.48542 (9)   | 0.0390 (6)                       |
| H6A  | -0.0379       | 0.3506      | 0.5198        | 0.047*                           |
| N7   | 0.39151 (11)  | 0.3181 (2)  | 0.38404 (9)   | 0.0340 (5)                       |
| C7   | 0.63923 (14)  | 0.5155 (3)  | 0.09473 (11)  | 0.0345 (6)                       |
| N8   | 0.43782 (11)  | 0.3651 (2)  | 0.48167 (9)   | 0.0361 (6)                       |
| H8A  | 0.4634        | 0.4008      | 0.5158        | 0.043*                           |
| C8   | 0.61318 (14)  | 0.4240 (3)  | 0.18450 (11)  | 0.0378 (7)                       |
| C9   | 0.62711 (14)  | 0.3131 (3)  | 0.22200 (11)  | 0.0404 (6)                       |
| H9   | 0.6364        | 0.2251      | 0.2106        | 0.049*                           |
| C10  | 0.62630 (16)  | 0.3428 (3)  | 0.27891 (13)  | 0.0508 (8)                       |
| H10  | 0.6350        | 0.2763      | 0.3092        | 0.061*                           |
| C11  | 0.61173 (15)  | 0.4774 (3)  | 0.28664 (12)  | 0.0455 (7)                       |
| C12  | 0.60674 (18)  | 0.5469 (4)  | 0.34102 (13)  | 0.0659 (10)                      |
| H12C | 0.6155        | 0.4804      | 0.3731        | 0.099*                           |
| H12B | 0.5607        | 0.5852      | 0.3313        | 0.099*                           |
| H12A | 0.6408        | 0.6200      | 0.3537        | 0.099*                           |

---

|      |               |            |               |             |
|------|---------------|------------|---------------|-------------|
| C13  | 0.05699 (14)  | 0.4058 (3) | 0.07575 (11)  | 0.0374 (7)  |
| C14  | 0.11323 (14)  | 0.2663 (3) | 0.03135 (11)  | 0.0360 (7)  |
| C15  | 0.13826 (15)  | 0.2006 (3) | -0.00883 (13) | 0.0446 (7)  |
| H15  | 0.1219        | 0.2236     | -0.0497       | 0.054*      |
| C16  | 0.18899 (16)  | 0.0986 (3) | 0.01462 (14)  | 0.0510 (8)  |
| H16  | 0.2065        | 0.0516     | -0.0112       | 0.061*      |
| C17  | 0.21384 (15)  | 0.0659 (3) | 0.07538 (14)  | 0.0485 (8)  |
| H17  | 0.2481        | -0.0021    | 0.0897        | 0.058*      |
| C18  | 0.18866 (14)  | 0.1329 (3) | 0.11603 (12)  | 0.0419 (7)  |
| H18  | 0.2051        | 0.1103     | 0.1570        | 0.050*      |
| C19  | 0.13835 (14)  | 0.2338 (3) | 0.09258 (11)  | 0.0353 (6)  |
| C20  | 0.11067 (14)  | 0.3246 (3) | 0.18123 (12)  | 0.0378 (6)  |
| C21  | 0.12525 (15)  | 0.4350 (3) | 0.21886 (12)  | 0.0447 (7)  |
| H21  | 0.1349        | 0.5230     | 0.2077        | 0.054*      |
| C22  | 0.12435 (16)  | 0.4039 (3) | 0.27656 (13)  | 0.0491 (8)  |
| H22  | 0.1331        | 0.4695     | 0.3072        | 0.059*      |
| C23  | 0.10938 (15)  | 0.2683 (3) | 0.28339 (12)  | 0.0449 (7)  |
| C24  | 0.10396 (17)  | 0.1976 (4) | 0.33751 (12)  | 0.0603 (9)  |
| H24C | 0.1133        | 0.2631     | 0.3700        | 0.090*      |
| H24B | 0.1375        | 0.1234     | 0.3497        | 0.090*      |
| H24A | 0.0576        | 0.1606     | 0.3277        | 0.090*      |
| C25  | -0.05825 (14) | 0.3507 (3) | 0.43132 (11)  | 0.0343 (6)  |
| C26  | -0.11361 (14) | 0.4878 (3) | 0.47748 (12)  | 0.0355 (6)  |
| C27  | -0.13628 (15) | 0.5557 (3) | 0.51859 (12)  | 0.0423 (7)  |
| H27  | -0.1173       | 0.5357     | 0.5598        | 0.051*      |
| C28  | -0.18835 (15) | 0.6547 (3) | 0.49612 (13)  | 0.0455 (8)  |
| H28  | -0.2048       | 0.7016     | 0.5227        | 0.055*      |
| C29  | -0.21620 (15) | 0.6850 (3) | 0.43523 (13)  | 0.0442 (7)  |
| H29  | -0.2506       | 0.7530     | 0.4217        | 0.053*      |
| C30  | -0.19406 (15) | 0.6161 (3) | 0.39328 (12)  | 0.0415 (7)  |
| H30  | -0.2134       | 0.6356     | 0.3521        | 0.050*      |
| C31  | -0.14196 (14) | 0.5177 (3) | 0.41604 (11)  | 0.0327 (6)  |
| C32  | -0.11787 (13) | 0.4306 (3) | 0.32573 (11)  | 0.0346 (6)  |
| C33  | -0.17957 (14) | 0.4189 (3) | 0.27850 (11)  | 0.0415 (7)  |
| H33  | -0.2228       | 0.4067     | 0.2825        | 0.050*      |
| C34  | -0.16990 (16) | 0.4275 (3) | 0.22232 (12)  | 0.0484 (8)  |
| H34  | -0.2069       | 0.4215     | 0.1854        | 0.058*      |
| C35  | -0.10266 (16) | 0.4451 (3) | 0.22650 (12)  | 0.0451 (7)  |
| C36  | -0.0739 (2)   | 0.4584 (4) | 0.17661 (14)  | 0.0654 (10) |
| H36C | -0.1115       | 0.4531     | 0.1381        | 0.098*      |
| H36B | -0.0412       | 0.3846     | 0.1798        | 0.098*      |
| H36A | -0.0505       | 0.5461     | 0.1800        | 0.098*      |
| C37  | 0.44090 (14)  | 0.4005 (3) | 0.42695 (11)  | 0.0356 (7)  |
| C38  | 0.38749 (13)  | 0.2631 (3) | 0.47471 (11)  | 0.0320 (6)  |

---

|      |              |            |              |             |
|------|--------------|------------|--------------|-------------|
| C39  | 0.36665 (15) | 0.1953 (3) | 0.51688 (12) | 0.0406 (7)  |
| H39  | 0.3863       | 0.2164     | 0.5579       | 0.049*      |
| C40  | 0.31513 (15) | 0.0941 (3) | 0.49538 (13) | 0.0436 (7)  |
| H40  | 0.3006       | 0.0452     | 0.5226       | 0.052*      |
| C41  | 0.28516 (15) | 0.0649 (3) | 0.43416 (13) | 0.0430 (7)  |
| H41  | 0.2503       | -0.0024    | 0.4211       | 0.052*      |
| C42  | 0.30596 (14) | 0.1340 (3) | 0.39174 (12) | 0.0391 (7)  |
| H42  | 0.2857       | 0.1144     | 0.3506       | 0.047*      |
| C43  | 0.35765 (13) | 0.2324 (3) | 0.41323 (11) | 0.0321 (6)  |
| C44  | 0.37998 (13) | 0.3196 (3) | 0.32203 (11) | 0.0331 (6)  |
| C45  | 0.31809 (14) | 0.3317 (3) | 0.27535 (11) | 0.0422 (7)  |
| H45  | 0.2752       | 0.3443     | 0.2799       | 0.051*      |
| C46  | 0.32684 (16) | 0.3230 (3) | 0.21891 (12) | 0.0497 (8)  |
| H46  | 0.2894       | 0.3285     | 0.1822       | 0.060*      |
| C47  | 0.39350 (17) | 0.3060 (3) | 0.22224 (12) | 0.0468 (8)  |
| C48  | 0.4223 (2)   | 0.2909 (4) | 0.17202 (14) | 0.0700 (11) |
| H48C | 0.3846       | 0.2973     | 0.1335       | 0.105*      |
| H48B | 0.4449       | 0.2024     | 0.1754       | 0.105*      |
| H48A | 0.4556       | 0.3635     | 0.1753       | 0.105*      |

**Table 3** Bond length (Å,) for compound Imp-7

| Bond length | (Å)       | Bond length | (Å)       |
|-------------|-----------|-------------|-----------|
| S1—C11      | 1.724 (3) | C14—C19     | 1.387 (4) |
| S1—C8       | 1.725 (3) | C15—C16     | 1.392 (4) |
| O1—C1       | 1.227 (3) | C15—H15     | 0.9300    |
| N1—C1       | 1.398 (3) | C16—C17     | 1.378 (4) |
| N1—C8       | 1.406 (3) | C16—H16     | 0.9300    |
| N1—C7       | 1.407 (3) | C17—C18     | 1.401 (4) |
| C1—N2       | 1.361 (3) | C17—H17     | 0.9300    |
| N2—C2       | 1.382 (3) | C18—C19     | 1.379 (4) |
| N2—H2A      | 0.8600    | C18—H18     | 0.9300    |
| C2—C7       | 1.389 (3) | C20—C21     | 1.350 (4) |
| C2—C3       | 1.391 (4) | C21—C22     | 1.404 (4) |
| S2—C23      | 1.721 (3) | C21—H21     | 0.9300    |
| S2—C20      | 1.732 (3) | C22—C23     | 1.365 (4) |
| O2—C13      | 1.228 (3) | C22—H22     | 0.9300    |
| C3—C4       | 1.389 (4) | C23—C24     | 1.489 (4) |
| C3—H3       | 0.9300    | C24—H24C    | 0.9600    |
| S3—C35      | 1.716 (3) | C24—H24B    | 0.9600    |
| S3—C32      | 1.729 (3) | C24—H24A    | 0.9600    |
| O3—C25      | 1.229 (3) | C26—C27     | 1.384 (4) |
| N3—C13      | 1.394 (3) | C26—C31     | 1.388 (4) |
| N3—C19      | 1.402 (3) | C27—C28     | 1.386 (4) |
| N3—C20      | 1.406 (3) | C27—H27     | 0.9300    |

---

|          |           |          |           |
|----------|-----------|----------|-----------|
| S4—C47   | 1.722 (3) | C28—C29  | 1.377 (4) |
| S4—C44   | 1.730 (3) | C28—H28  | 0.9300    |
| O4—C37   | 1.227 (3) | C29—C30  | 1.398 (4) |
| C4—C5    | 1.378 (4) | C29—H29  | 0.9300    |
| C4—H4    | 0.9300    | C30—C31  | 1.383 (4) |
| N4—C13   | 1.360 (3) | C30—H30  | 0.9300    |
| N4—C14   | 1.387 (3) | C32—C33  | 1.357 (3) |
| N4—H4A   | 0.8600    | C33—C34  | 1.415 (4) |
| C5—C6    | 1.394 (4) | C33—H33  | 0.9300    |
| C5—H5    | 0.9300    | C34—C35  | 1.354 (4) |
| N5—C25   | 1.394 (3) | C34—H34  | 0.9300    |
| N5—C32   | 1.401 (3) | C35—C36  | 1.502 (4) |
| N5—C31   | 1.406 (3) | C36—H36C | 0.9600    |
| C6—C7    | 1.382 (4) | C36—H36B | 0.9600    |
| C6—H6    | 0.9300    | C36—H36A | 0.9600    |
| N6—C25   | 1.360 (3) | C38—C39  | 1.382 (3) |
| N6—C26   | 1.390 (3) | C38—C43  | 1.392 (3) |
| N6—H6A   | 0.8600    | C39—C40  | 1.391 (4) |
| N7—C37   | 1.395 (3) | C39—H39  | 0.9300    |
| N7—C44   | 1.400 (3) | C40—C41  | 1.383 (4) |
| N7—C43   | 1.408 (3) | C40—H40  | 0.9300    |
| N8—C37   | 1.362 (3) | C41—C42  | 1.392 (4) |
| N8—C38   | 1.390 (3) | C41—H41  | 0.9300    |
| N8—H8A   | 0.8600    | C42—C43  | 1.375 (4) |
| C8—C9    | 1.352 (4) | C42—H42  | 0.9300    |
| C9—C10   | 1.382 (4) | C44—C45  | 1.353 (3) |
| C9—H9    | 0.9300    | C45—C46  | 1.412 (4) |
| C10—C11  | 1.358 (4) | C45—H45  | 0.9300    |
| C10—H10  | 0.9300    | C46—C47  | 1.348 (4) |
| C11—C12  | 1.486 (4) | C46—H46  | 0.9300    |
| C12—H12C | 0.9600    | C47—C48  | 1.511 (4) |
| C12—H12B | 0.9600    | C48—H48C | 0.9600    |
| C12—H12A | 0.9600    | C48—H48B | 0.9600    |
| C14—C15  | 1.384 (4) | C48—H48A | 0.9600    |

---

**Table 4** Valence angles (°) for compound Imp-7

| Valence angles | (°)        | Valence angles | (°)         |
|----------------|------------|----------------|-------------|
| C11—S1—C8      | 92.00 (14) | C20—C21—H21    | 123.3       |
| C1—N1—C8       | 123.0 (2)  | C22—C21—H21    | 123.3       |
| C1—N1—C7       | 109.1 (2)  | C23—C22—C21    | 113.7 (3)   |
| C8—N1—C7       | 127.9 (2)  | C23—C22—H22    | 123.2       |
| O1—C1—N2       | 128.0 (2)  | C21—C22—H22    | 123.2       |
| O1—C1—N1       | 125.7 (2)  | C22—C23—C24    | 129.0 (3)   |
| N2—C1—N1       | 106.3 (2)  | C22—C23—S2     | 110.2 (2)   |
| C1—N2—C2       | 110.5 (2)  | C24—C23—S2     | 120.8 (2)   |
| C1—N2—H2A      | 124.8      | C23—C24—H24C   | 109.5       |
| C2—N2—H2A      | 124.8      | C23—C24—H24B   | 109.5       |
| N2—C2—C7       | 107.9 (2)  | H24C—C24—H24B  | 109.5       |
| N2—C2—C3       | 131.0 (2)  | C23—C24—H24A   | 109.5       |
| C7—C2—C3       | 121.1 (3)  | H24C—C24—H24A  | 109.5       |
| C23—S2—C20     | 92.13 (15) | H24B—C24—H24A  | 109.5       |
| C4—C3—C2       | 117.2 (3)  | O3—C25—N6      | 128.3 (2)   |
| C4—C3—H3       | 121.4      | O3—C25—N5      | 125.3 (2)   |
| C2—C3—H3       | 121.4      | N6—C25—N5      | 106.4 (2)   |
| C35—S3—C32     | 92.08 (14) | C27—C26—C31    | 121.2 (3)   |
| C13—N3—C19     | 109.2 (2)  | C27—C26—N6     | 131.4 (3)   |
| C13—N3—C20     | 123.3 (2)  | C31—C26—N6     | 107.4 (2)   |
| C19—N3—C20     | 127.4 (2)  | C26—C27—C28    | 117.5 (3)   |
| C47—S4—C44     | 91.68 (14) | C26—C27—H27    | 121.2       |
| C5—C4—C3       | 121.6 (3)  | C28—C27—H27    | 121.2       |
| C5—C4—H4       | 119.2      | C29—C28—C27    | 121.3 (3)   |
| C3—C4—H4       | 119.2      | C29—C28—H28    | 119.4       |
| C13—N4—C14     | 110.6 (2)  | C27—C28—H28    | 119.4       |
| C13—N4—H4A     | 124.7      | C28—C29—C30    | 121.6 (3)   |
| C14—N4—H4A     | 124.7      | C28—C29—H29    | 119.2       |
| C4—C5—C6       | 121.3 (3)  | C30—C29—H29    | 119.2       |
| C4—C5—H5       | 119.3      | C31—C30—C29    | 116.8 (3)   |
| C6—C5—H5       | 119.3      | C31—C30—H30    | 121.6       |
| C25—N5—C32     | 124.7 (2)  | C29—C30—H30    | 121.6       |
| C25—N5—C31     | 109.1 (2)  | C30—C31—C26    | 121.6 (2)   |
| C32—N5—C31     | 126.2 (2)  | C30—C31—N5     | 131.8 (2)   |
| C7—C6—C5       | 117.2 (3)  | C26—C31—N5     | 106.6 (2)   |
| C7—C6—H6       | 121.4      | C33—C32—N5     | 127.6 (2)   |
| C5—C6—H6       | 121.4      | C33—C32—S3     | 111.5 (2)   |
| C25—N6—C26     | 110.5 (2)  | N5—C32—S3      | 120.83 (19) |
| C25—N6—H6A     | 124.7      | C32—C33—C34    | 111.5 (3)   |
| C26—N6—H6A     | 124.7      | C32—C33—H33    | 124.3       |
| C37—N7—C44     | 124.2 (2)  | C34—C33—H33    | 124.3       |
| C37—N7—C43     | 109.4 (2)  | C35—C34—C33    | 114.8 (3)   |

---

|               |           |               |             |
|---------------|-----------|---------------|-------------|
| C44—N7—C43    | 126.4 (2) | C35—C34—H34   | 122.6       |
| C6—C7—C2      | 121.5 (2) | C33—C34—H34   | 122.6       |
| C6—C7—N1      | 132.2 (2) | C34—C35—C36   | 128.9 (3)   |
| C2—C7—N1      | 106.3 (2) | C34—C35—S3    | 110.1 (2)   |
| C37—N8—C38    | 110.5 (2) | C36—C35—S3    | 121.0 (2)   |
| C37—N8—H8A    | 124.8     | C35—C36—H36C  | 109.5       |
| C38—N8—H8A    | 124.8     | C35—C36—H36B  | 109.5       |
| C9—C8—N1      | 128.2 (3) | H36C—C36—H36B | 109.5       |
| C9—C8—S1      | 110.3 (2) | C35—C36—H36A  | 109.5       |
| N1—C8—S1      | 121.3 (2) | H36C—C36—H36A | 109.5       |
| C8—C9—C10     | 113.7 (3) | H36B—C36—H36A | 109.5       |
| C8—C9—H9      | 123.1     | O4—C37—N8     | 128.0 (2)   |
| C10—C9—H9     | 123.1     | O4—C37—N7     | 125.7 (2)   |
| C11—C10—C9    | 114.1 (3) | N8—C37—N7     | 106.3 (2)   |
| C11—C10—H10   | 122.9     | C39—C38—N8    | 131.0 (2)   |
| C9—C10—H10    | 122.9     | C39—C38—C43   | 121.4 (2)   |
| C10—C11—C12   | 129.3 (3) | N8—C38—C43    | 107.6 (2)   |
| C10—C11—S1    | 109.8 (2) | C38—C39—C40   | 117.2 (3)   |
| C12—C11—S1    | 120.8 (3) | C38—C39—H39   | 121.4       |
| C11—C12—H12C  | 109.5     | C40—C39—H39   | 121.4       |
| C11—C12—H12B  | 109.5     | C41—C40—C39   | 121.2 (3)   |
| H12C—C12—H12B | 109.5     | C41—C40—H40   | 119.4       |
| C11—C12—H12A  | 109.5     | C39—C40—H40   | 119.4       |
| H12C—C12—H12A | 109.5     | C40—C41—C42   | 121.5 (3)   |
| H12B—C12—H12A | 109.5     | C40—C41—H41   | 119.3       |
| O2—C13—N4     | 127.7 (3) | C42—C41—H41   | 119.3       |
| O2—C13—N3     | 126.2 (2) | C43—C42—C41   | 117.2 (3)   |
| N4—C13—N3     | 106.2 (2) | C43—C42—H42   | 121.4       |
| C15—C14—N4    | 131.1 (2) | C41—C42—H42   | 121.4       |
| C15—C14—C19   | 121.6 (3) | C42—C43—C38   | 121.5 (2)   |
| N4—C14—C19    | 107.3 (2) | C42—C43—N7    | 132.2 (2)   |
| C14—C15—C16   | 117.1 (3) | C38—C43—N7    | 106.2 (2)   |
| C14—C15—H15   | 121.4     | C45—C44—N7    | 127.7 (2)   |
| C16—C15—H15   | 121.4     | C45—C44—S4    | 111.6 (2)   |
| C17—C16—C15   | 121.3 (3) | N7—C44—S4     | 120.59 (19) |
| C17—C16—H16   | 119.3     | C44—C45—C46   | 111.5 (3)   |
| C15—C16—H16   | 119.3     | C44—C45—H45   | 124.2       |
| C16—C17—C18   | 121.5 (3) | C46—C45—H45   | 124.2       |
| C16—C17—H17   | 119.3     | C47—C46—C45   | 114.9 (3)   |
| C18—C17—H17   | 119.3     | C47—C46—H46   | 122.5       |
| C19—C18—C17   | 117.0 (3) | C45—C46—H46   | 122.5       |
| C19—C18—H18   | 121.5     | C46—C47—C48   | 129.7 (3)   |
| C17—C18—H18   | 121.5     | C46—C47—S4    | 110.2 (2)   |
| C18—C19—C14   | 121.5 (3) | C48—C47—S4    | 120.1 (3)   |

---



---

|             |           |               |       |
|-------------|-----------|---------------|-------|
| C18—C19—N3  | 131.9 (2) | C47—C48—H48C  | 109.5 |
| C14—C19—N3  | 106.7 (2) | C47—C48—H48B  | 109.5 |
| C21—C20—N3  | 128.3 (3) | H48C—C48—H48B | 109.5 |
| C21—C20—S2  | 110.7 (2) | C47—C48—H48A  | 109.5 |
| N3—C20—S2   | 120.9 (2) | H48C—C48—H48A | 109.5 |
| C20—C21—C22 | 113.3 (3) | H48B—C48—H48A | 109.5 |

---

## 2. Preparation/seperation of Imp-1~ -8

Unless otherwise stated, all commercial reagents and solvents were used without additional purification. Analytical TLC was visualized with UV light at 254nm. Purification of reaction products was carried out by chromatography using silica gel 60 (200-400 mesh).

### 2.1 Imp-1 (2-methyl-4-(1-piperazinyl)-10H-thieno [2, 3-b] [1, 5] benzodiazepine)

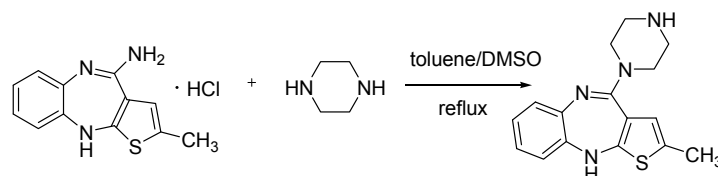

4-amino-2-methyl-10H-thieno[2,3-b][1,5]-benzodiazepine hydrochloride (5.01g, 0.0189mol), piperazine (9.76g, 0.1134mol) were added into a 100ml three-necked flask, refluxed for 5h in the mixed solvent of 10ml toluene and 20ml DMSO. The mixture was cooled to 50°C, 400ml water added. The product was filtered and 4.59g off-white powder was obtained (yield: 81.5%, CDP20100419 ②).<sup>1</sup>

It was purified by crystallizing from ethanol/water (4:1) to get a slightly pink powder.

(M+1)329.0, <sup>1</sup>H NMR (400 MHz, DMSO-d<sub>6</sub>), δ 7.57 (s, 1H, C-NH-C), 6.81 (dt, 3H, Ar-H), 6.72- 6.59 (m, 1H, Ar-H), 6.34 (s, 1H, C-CH-C on thiophene ring), 3.27 (d, 4H, CH<sub>2</sub>-NH-CH<sub>2</sub>), 2.83-2.62 (m, 4H, CH<sub>2</sub>-N-CH<sub>2</sub>), 2.27(s, 3H, S-C-CH<sub>3</sub>)

### 2.2 Imp-2 (2-methyl-4-(N-oxo-4-methyl-1-piperazinyl)-10H-thieno [2, 3-b] [1, 5] benzodiazepine)

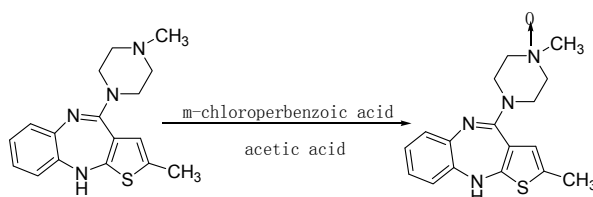

To a mixture of olanzapine (CDP20091228, 5g, 0.016mol) in acetic acid (25ml), *m*-chloroperbenzoic acid (3.99g, 0.016mol) was added and the mixture stirred at 50°C for reaction completion. The reaction mass was concentrated under reduced pressure and the residual mass was dissolved in dichloromethane (25ml). The resultant solution was washed with water, concentrated under reduced pressure and finally purified by column chromatography (CH<sub>2</sub>Cl<sub>2</sub>: MeOH: Et<sub>2</sub>NH) to yield Imp-2 (1.2g, CDP20100421).<sup>1</sup>

(M+1)329.0; <sup>1</sup>H NMR (DMSO-d<sub>6</sub>), 7.74 (s, 1H, C-NH-C), 6.91-6.75 (m, 3H, Ar-H), 6.75-6.64 (m, 1H, Ar-H), 6.39 (s, 1H, C-CH-C on thiophene ring), 3.78 (d, J =

12 Hz, 2H, CH<sub>2</sub>-N-CH<sub>2</sub>), 3.58 (t, J = 12 Hz, 2H, CH<sub>2</sub>-N-CH<sub>2</sub>), 3.40 (s, 2H, CH<sub>2</sub>-C-CH<sub>2</sub>), 3.12 (s, 3H, N-CH<sub>3</sub>), 2.99 (d, 2H, CH<sub>2</sub>-C-CH<sub>2</sub>), 2.27 (s, 3H, S-C-CH<sub>3</sub>)

### 2.3 Imp-3 (2-amino-5-methylthiophene-3-carbonitrile)

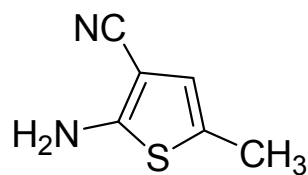

Imp-3

The preparative process was shown in the text (Fig. 1).

A mixture of sulphur (1.61g, 0.05mol), propionaldehyde (3.48g, 0.06mol) and dimethylformamide (10ml) was placed in a 100ml one-necked flask with dropping funnel. Triethylamine (4.21ml, 0.03mol) was added over 30minutes while the temperature was between 5-10°C with an ice-bath. The temperature was increased to 18°C keeping the mixture well stirred. Then a solution of malononitrile (3.35g, 0.05mol) in dimethylformamide (6.60ml) was added drop wise over 70min keeping the temperature about 20°C. The mixture was stirred at 15-20°C for a further 45min, and then sampled for TLC. The mixture was poured onto ice water (150ml) with stirring and the brick-red product precipitated. The solid was isolated by filtration, washed with water and then dried over night in vacuo to give the product (5.30g, yield: 76.8%, CDP20100305).<sup>2</sup>

It was purified by crystallizing from ethanol/water (1:1) to yield 2.82g brown powder.

<sup>1</sup>H NMR (CDCl<sub>3</sub>), δ 6.35 (s, 1H, C-CH-C), 4.60 (s, 2H, NH<sub>2</sub>), 2.28 (s, 3H, CH<sub>3</sub>)

### 2.4 Imp-4 (4-amino-2-methyl-10H-thieno [2, 3-b] [1, 5]-benzodiazepine hydrochloride)

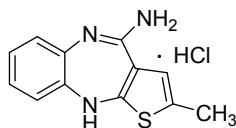

The preparative process was shown in the text (Fig. 1).

To stirred slurry of 2-(2-nitroanilino)-5-methylthiophene-3-carbonitrile (1g, 0.00386mol) in ethanol (20ml) at 50°C, a solution of anhydrous stannous chloride (3.48g, 0.0154mol) in hydrochloric acid (15ml) was added dropwise over 10 minutes. The mixture was stirred under reflux for 1h, concentrated under reduced pressure and allowed to crystallize over night at 50°C. The salt was filtered, washed with a small amount of water, dried to give the product (0.89g, yield: 87.3%, CDP20100406).<sup>2</sup>

$^1\text{H}$  NMR (DMSO- $d_6$ ),  $\delta$  11.15 (s, 1H, HCl), 9.59 (s, 1H, C-NH-C), 9.12 and 8.89 (s, s, 1H,  $\text{NH}_2$ ), 7.10 (t, 1H, Ar-H), 7.02 (t, 1H, Ar-H), 6.96 (d, 1H, Ar-H), 6.87 (d, 1H, Ar-H), 6.81 (s, 1H, C-CH-C on thiophene ring), 2.26 (s, 3H,  $\text{CH}_3$ )

## 2.5 Imp-5 (bis-2-methyl-4-(1-piperazinyl)-10H-thieno [2, 3-b] [1, 5] benzodiazepine)

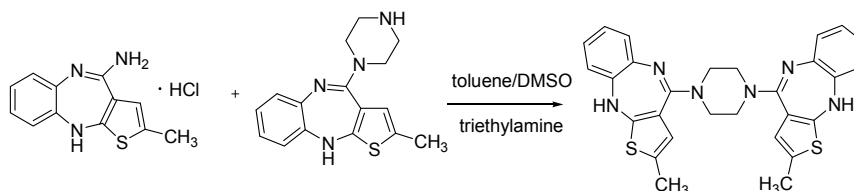

A mixture of Imp-1 (1.12g, 0.0037mol), dimethyl sulfoxide 2mL, toluene 8mL and Imp-4 (1.09g, 0.0037mol) was heated to reflux. 2ml triethylamine was added in three equal portions to the reaction mixture at reflux temperature of 102°C and the reaction mass was stirred for reaction completion. The product was filtered, dried, and purified by column chromatography ( $\text{CH}_2\text{Cl}_2$ : methanol:  $\text{Et}_2\text{NH}$ ) to give the product (0.8g, CDP20100508).<sup>1</sup>

(M+1)511.2;  $^1\text{H}$  NMR (DMSO- $d_6$ ),  $\delta$  7.67(s, 2H, two C-NH-C), 6.84 (m, 6H, two Ar-H), 6.69 (d, 2H, two Ar-H), 6.43(d, 2H, two C-CH-C on thiophene ring), 3.39 (d, 8H, two  $\text{CH}_2\text{-NH-CH}_2$ ) (d, 6H, two S-C- $\text{CH}_3$ )

## 2.6 Imp-6 (2-methyl-4-oxo-10H-thieno [2, 3-b] [1, 5] benzodiazepine)

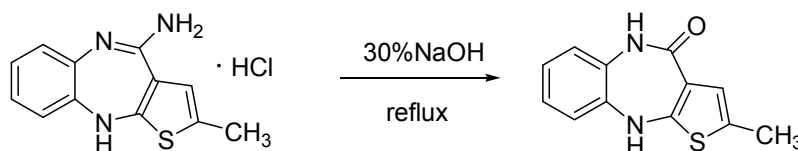

A mixture of Imp-3 (1.00g, 0.0038mol) and 30% aqueous sodium hydroxide (10mL) was heated to reflux at 98°C till the reaction was complete. The reaction mixture was cooled to room temperature and the resulting solid was filtered. The resultant wet cake was dissolved in methanol (20ml) at reflux, treated with carbon (0.2g) and finally water (50ml) was added to precipitate a solid. The isolated solid was filtered, washed with water (100mL) and dried at 70°C to give the product (0.50g, yield: 57.5%, CDP20100419).<sup>2</sup>

It was purified by column chromatography ( $\text{CH}_2\text{Cl}_2$ : methanol:  $\text{Et}_2\text{NH}$ ).

(M+1)231.1;  $^1\text{H}$  NMR (DMSO- $d_6$ ),  $\delta$  9.07 (s, 1H,  $\text{NH-C=O}$ ), 8.85 (s, 1H, C-NH-C), 6.95-6.82 (m, 3H, Ar-H), 6.81-6.72 (m, 1H, Ar-H), 6.59 (d, 1H, S-C- $\text{CH}_3$ ), 2.21 (d, 3H, S-C- $\text{CH}_3$ )

## 2.7 Imp-7 (1-(5-methyl-thiophen-2-yl)-1H-benzimidazol-2(3H)-one)

The isolation of Imp-7 was conducted from the crude sample of OLN crystallization mother liquid by preparative chromatography and fraction collection. The mobile phase used in preparative chromatography was a mixture of CH<sub>2</sub>Cl<sub>2</sub>, MeOH and Et<sub>2</sub>NH. Each collected fraction from preparative chromatography was analyzed by TLC and HPLC. The fractions of the confirmed same compound were pooled together and concentrated under high vacuum on a rota-evaporator.

### 2.8 Imp-8 (2-(2-nitroanilino)-5-methylthiophene-3-carbonitrile)

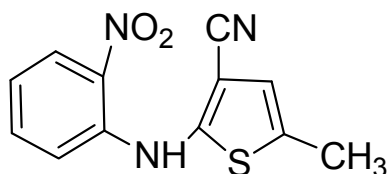

Imp-8

The preparative process was shown in the text (Fig. 1).

To stirred slurry of potassium hydride (1.156g, 0.0207mol) in dried DMF (4.44mL), a solution of 2-fluoronitrobenzene (2.04g, 0.0145mol) and 2-amino-5-methylthiophene-3-carbonitrile (2.00g, 0.0145mol) in dried DMF (17.78ml) was added dropwise over 30 minutes. The mixture was stirred at 10°C for 2 hours, poured into ice water (125ml). The brick-red product precipitated and was extracted into dichloromethane (120ml\*3), washed by water (200ml), dried. The solvent was removed under reduced pressure to give Imp-8 (1.64g, yield: 43.6%, CDP20100322).<sup>2</sup>

It was purified by crystallizing from ethanol.

<sup>1</sup>H NMR (CDCl<sub>3</sub>), δ 9.62 (s, 1H, C-NH-C), 8.25 (d, 1H, Ar-H), 7.52 (t, 1H, Ar-H), 7.19 (d, 1H, Ar-H), 6.97 (t, 1H, Ar-H), 6.78 (s, 1H, ) C-CH-C on thiophene ring, 2.48 (s, 3H, S-C-CH<sub>3</sub>)

### 3. Spectra of Imp-1~ -8

#### 3.1 Spectra of Imp-1 (Fig. 1- <sup>1</sup>H NMR, Fig. 2- MS)

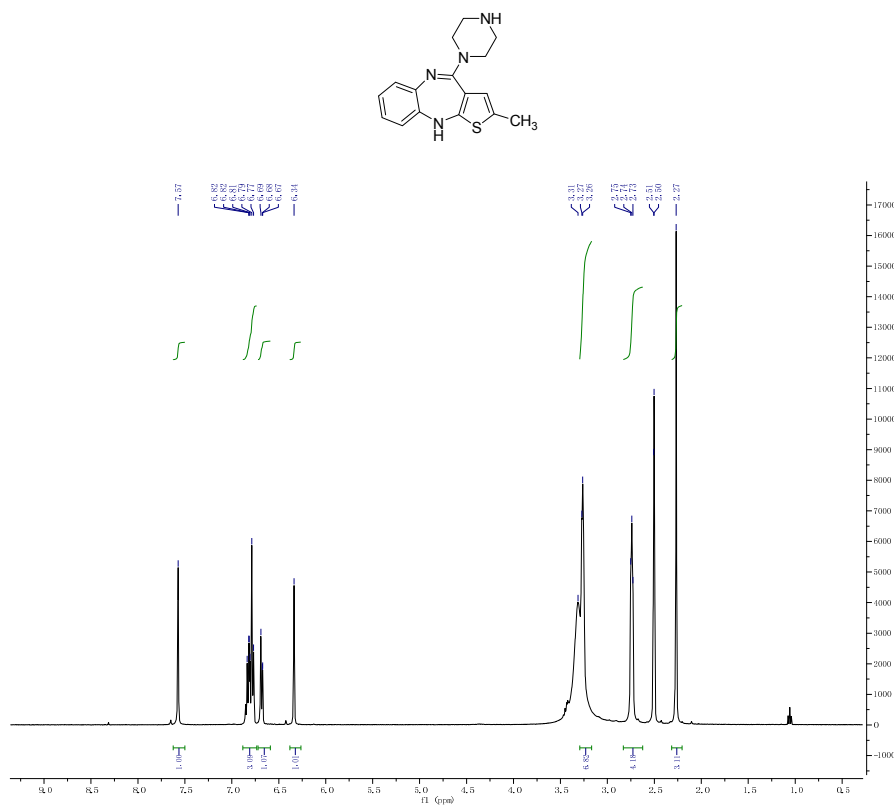

Fig. 1 <sup>1</sup>H NMR of Imp-1

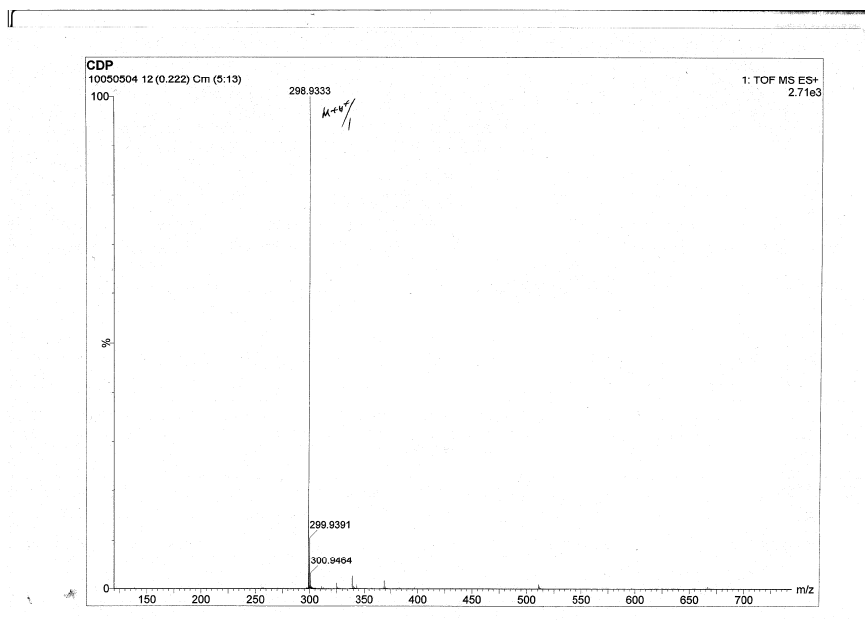

Fig. 2 MS of Imp-1

### 3.2 Spectra of Imp-2 (Fig. 3- $^1\text{H}$ NMR, Fig. 4- MS)

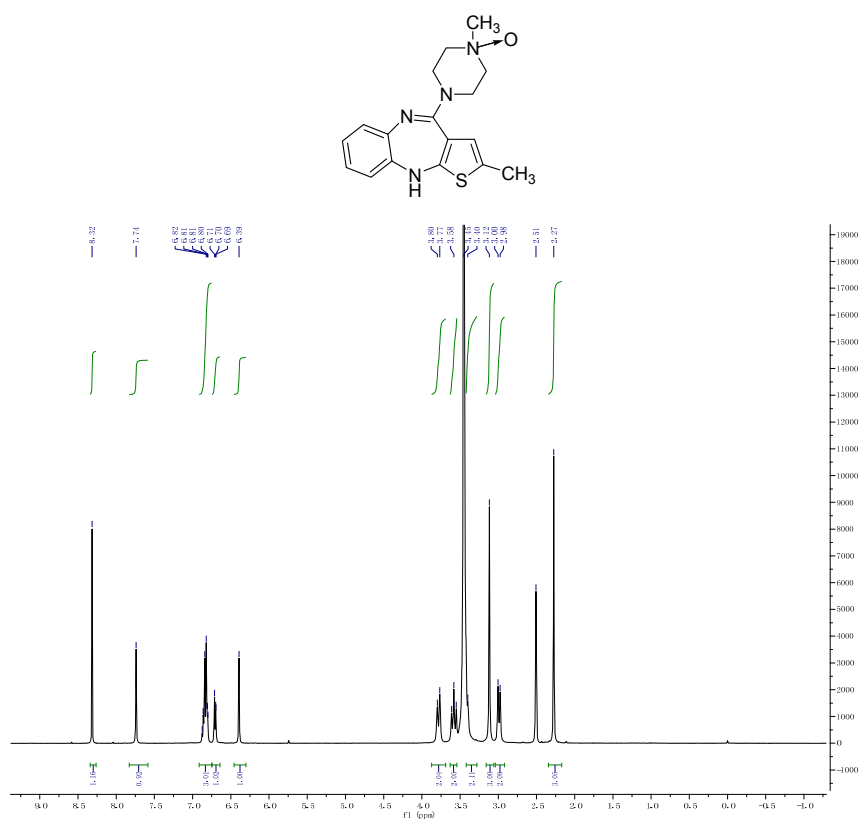

**Fig. 3**  $^1\text{H}$  NMR of Imp-2

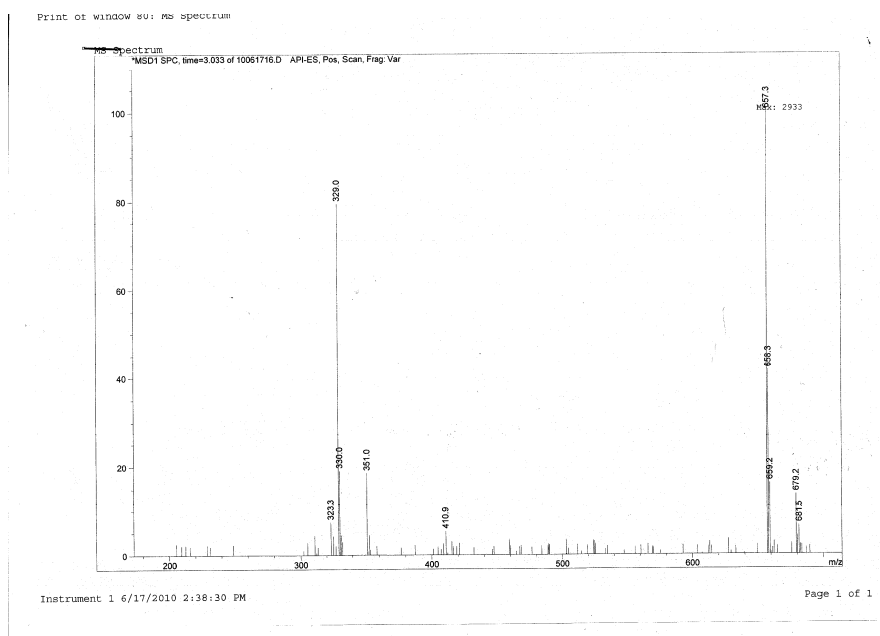

**Fig. 4** MS of Imp-2

### 3.3 Spectra of Imp-3 (Fig. 5- $^1\text{H}$ NMR)

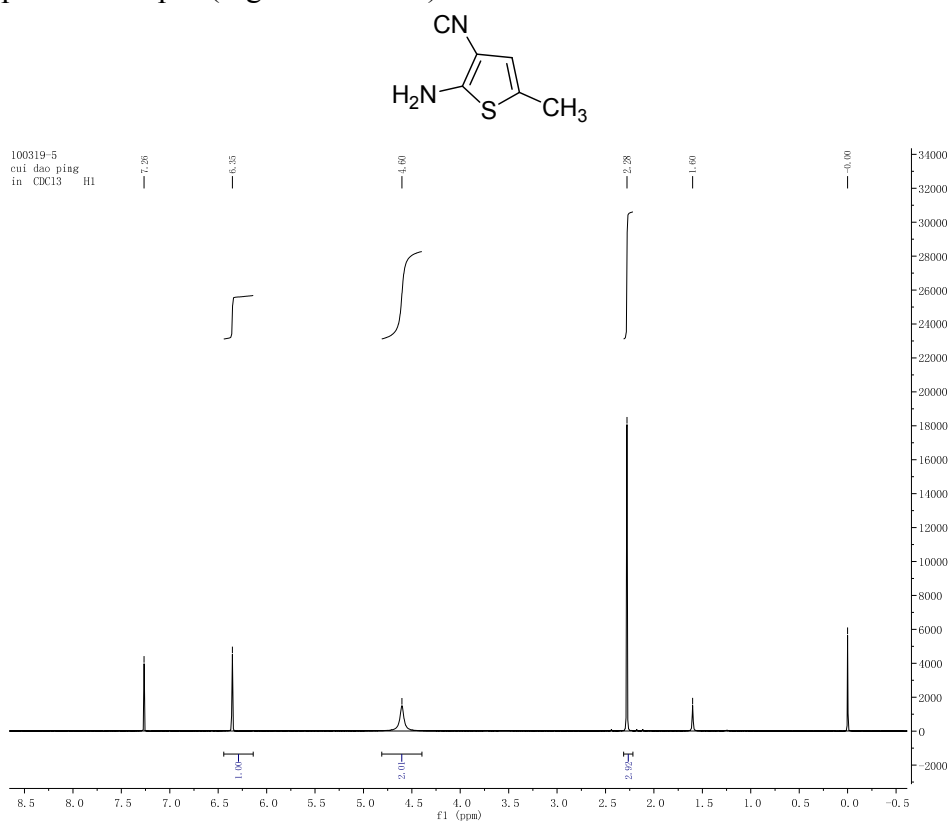

**Fig. 5**  $^1\text{H}$  NMR of Imp-3





### 3.5 Spectra of Imp-5 (Fig. 7- <sup>1</sup>H NMR, Fig. 8- MS)

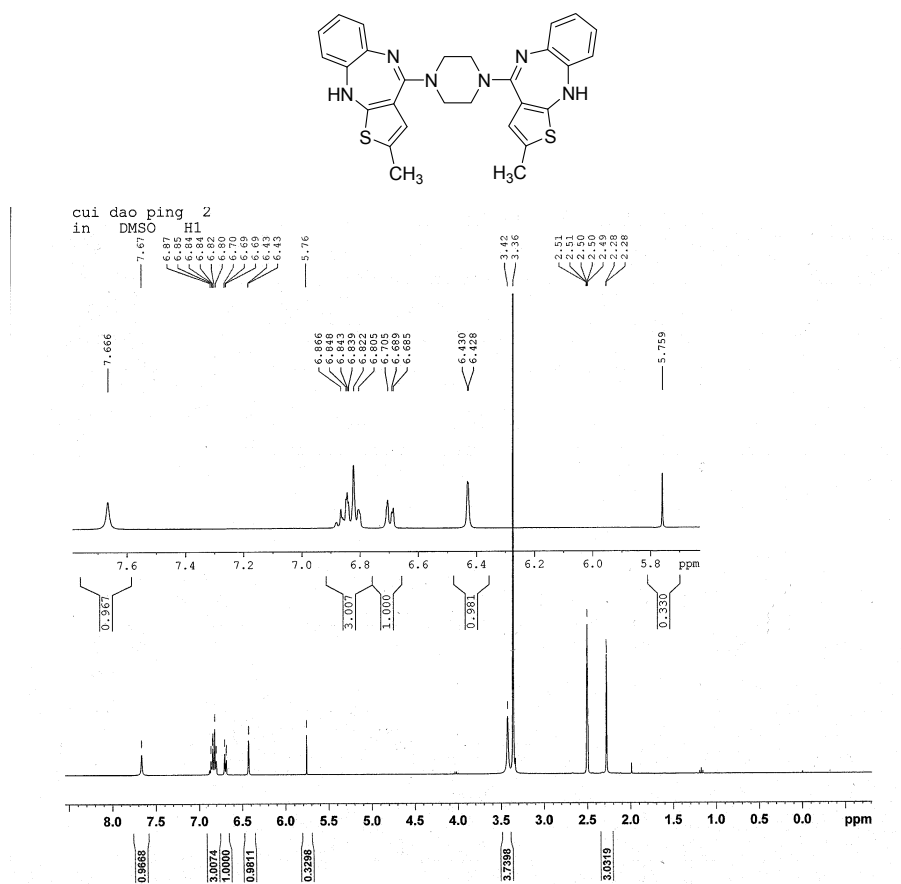

Fig. 7 <sup>1</sup>H NMR of Imp-5

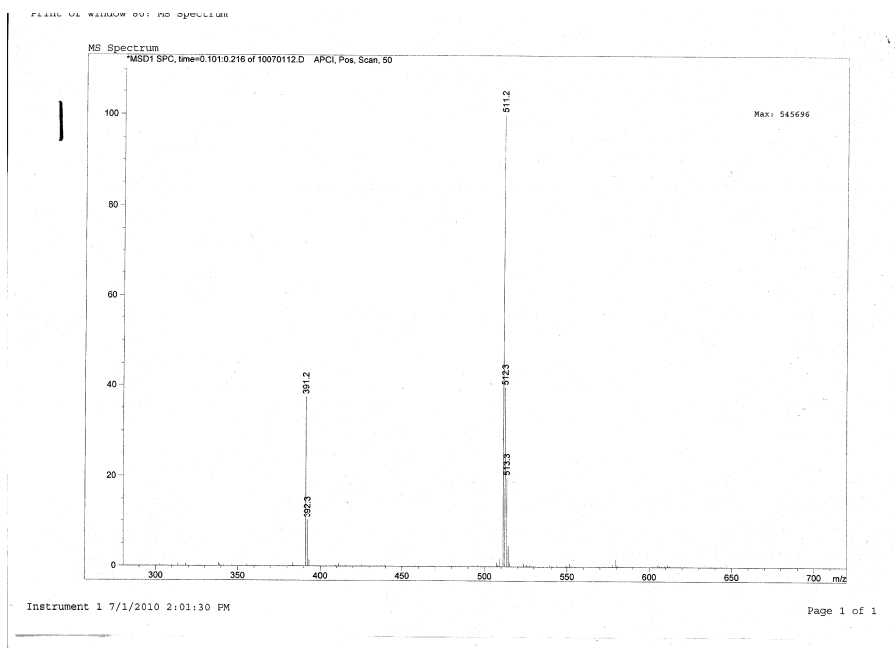

Fig. 8 MS of Imp-5

### 3.6 Spectra of Imp-6 (Fig. 9- $^1\text{H}$ NMR, Fig. 10- MS)

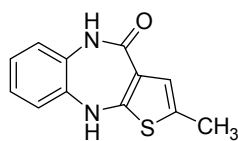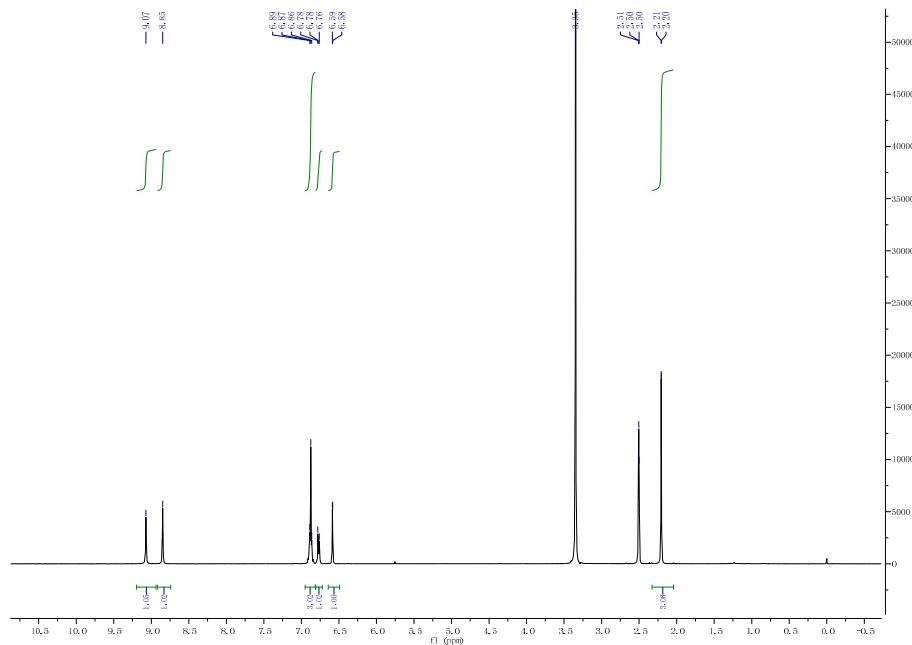

Fig. 9  $^1\text{H}$  NMR of Imp-6

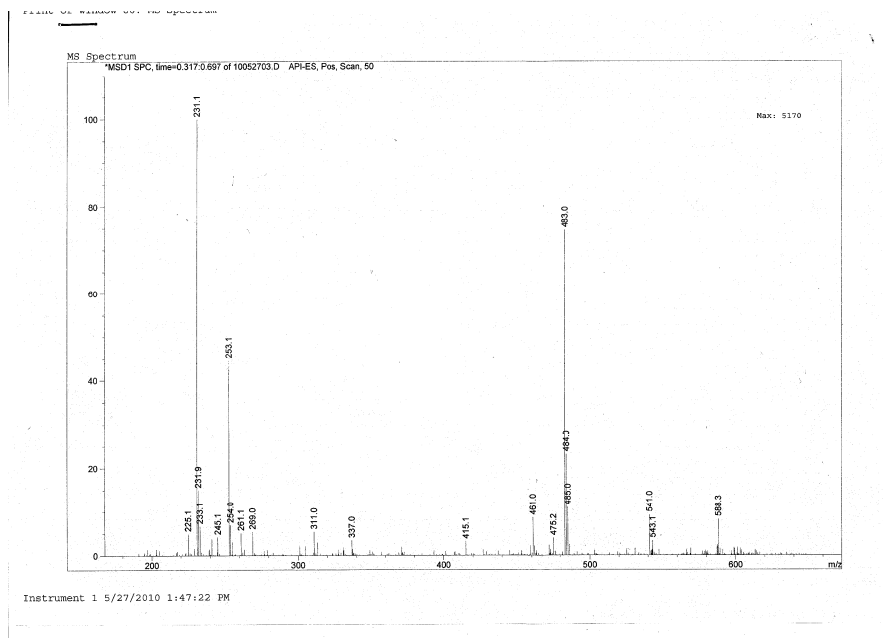

Fig. 10 MS of Imp-6

9. Spectra of Imp-7 (Fig. 11- ToF MS ES<sup>+</sup>, Fig. 12- <sup>1</sup>H NMR, Fig. 13- <sup>13</sup>C NMR, Fig. 14- HSQC, Fig. 15- IR)

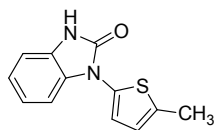

Elemental Composition Report

Page

Single Mass Analysis

Tolerance = 5.0 PPM / DBE: min = -10.0, max = 100.0  
 Selected filters: None

Monoisotopic Mass, Even Electron Ions

277 formula(e) evaluated with 2 results within limits (all results (up to 1000) for each mass)

Elements Used:

C: 0-100 H: 0-120 N: 2-6 O: 0-4 Na: 1-1 S: 0-2

CDP-1

10122400 64 (1.632) AM (Cen.6, 80.00, Ar.5000.0,429.20,0.70,LS 10); Sm (SG, 2x3.00); Sb (1,40.00); Cm (60:72)

1: TOF MS E;  
 1.87

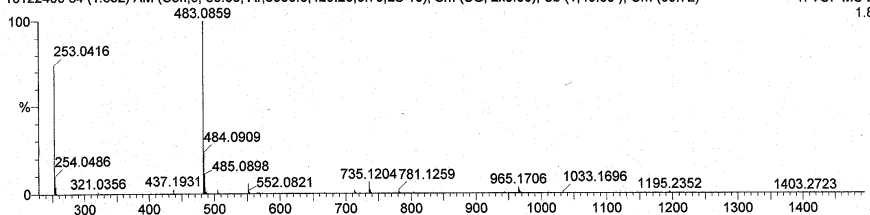

| Mass     | Calc. Mass | mDa | PPM | DBE  | i-FIT | Formula            |
|----------|------------|-----|-----|------|-------|--------------------|
| 253.0416 | 253.0412   | 0.4 | 1.6 | 8.5  | 17.6  | C12 H10 N2 O Na S  |
|          | 253.0405   | 1.1 | 4.3 | -0.5 | 406.2 | C4 H14 N4 O3 Na S2 |

Fig. 11 ToF MS ES<sup>+</sup> of Imp-7

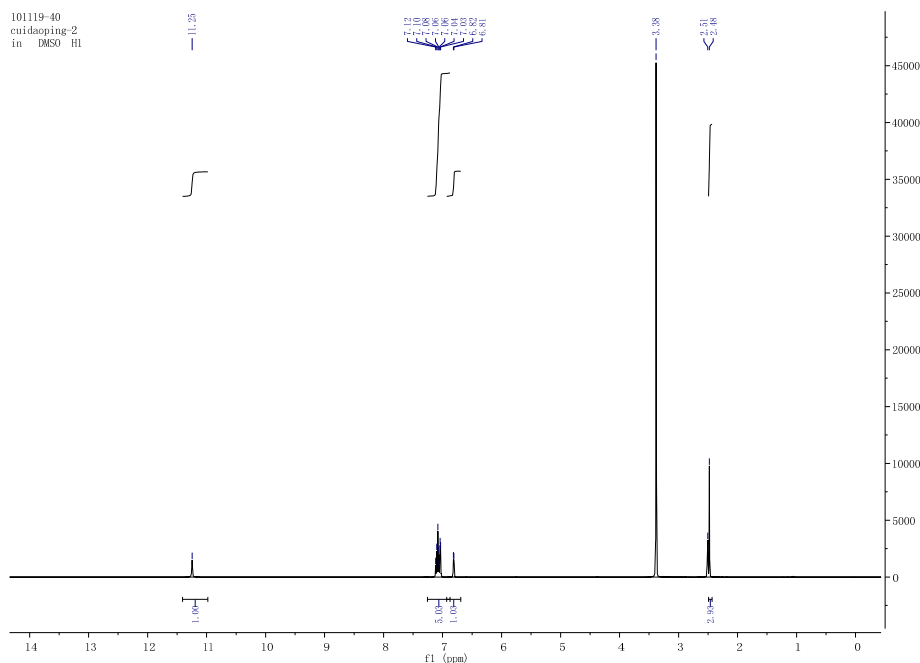

Fig. 12 <sup>1</sup>H NMR of Imp-7

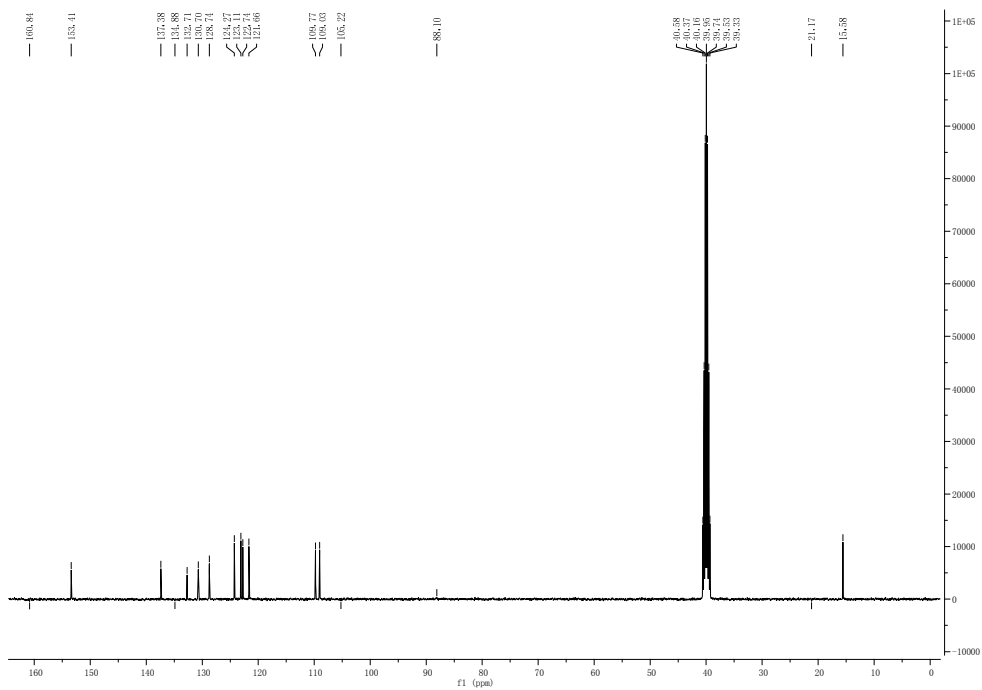

Fig. 13  $^{13}\text{C}$  NMR of Imp-7

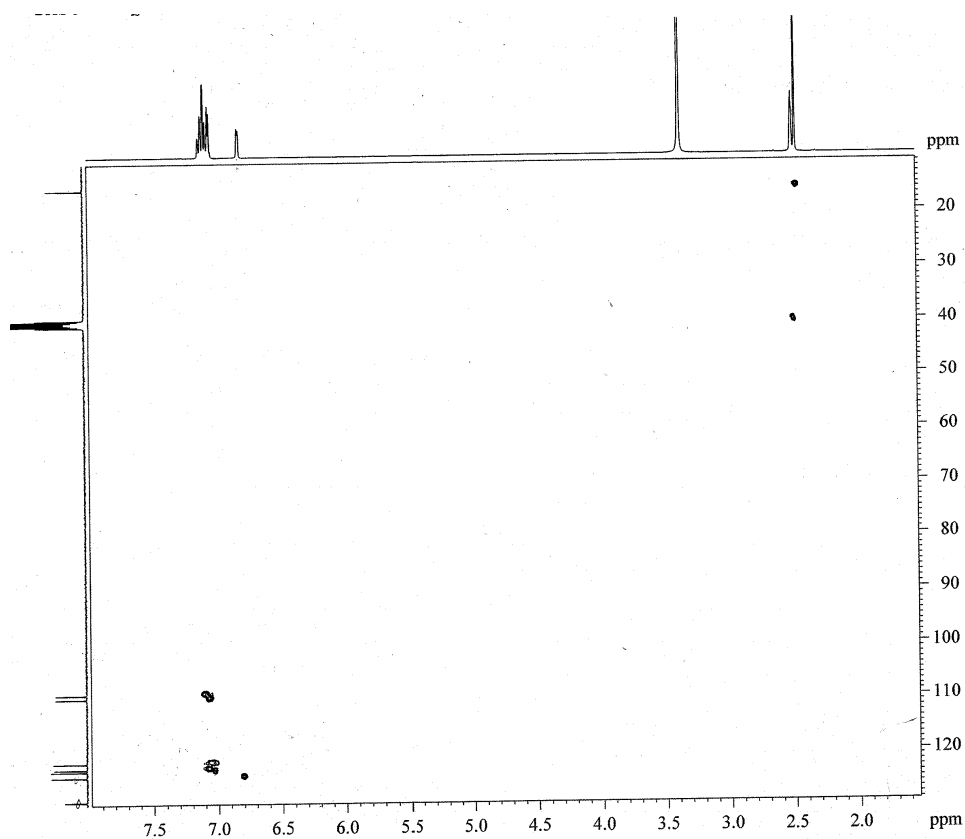

Fig. 14 HSQC of Imp-7

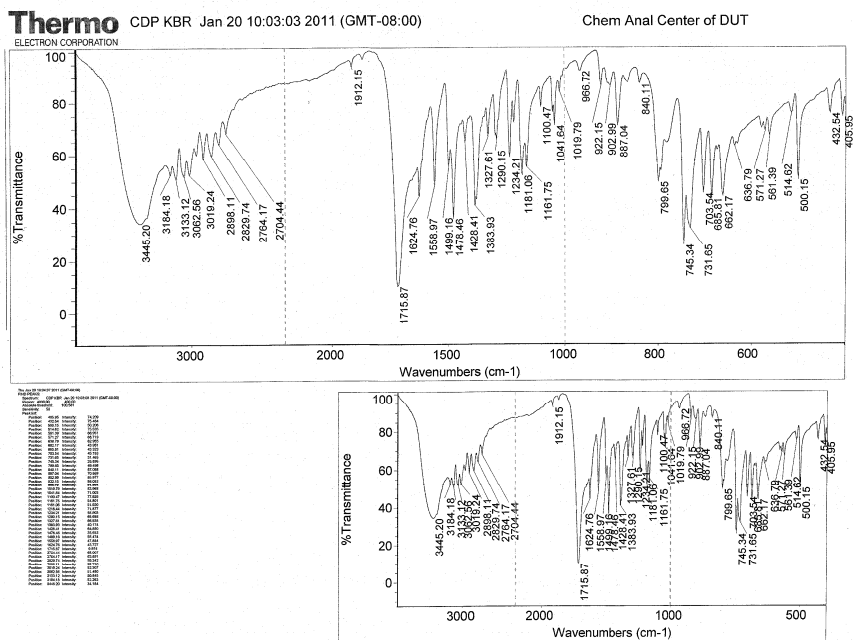

Fig. 15 IR of Imp-7

3.8 Spectra of Imp-8 (Fig. 16- <sup>1</sup>H NMR)

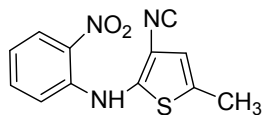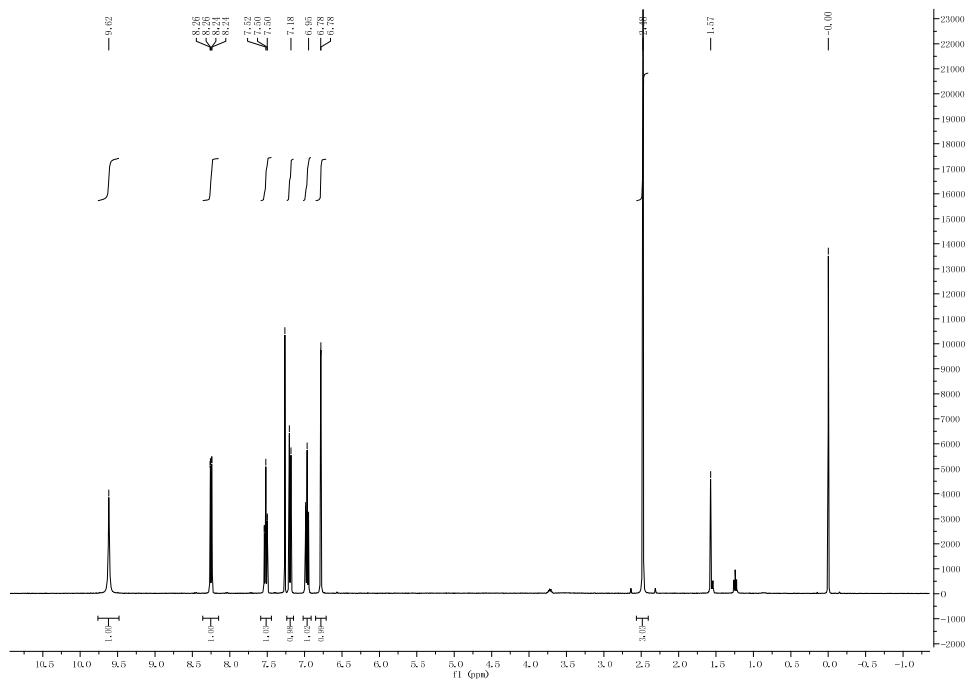

Fig. 16 <sup>1</sup>H NMR of Imp-8

#### 4. Linear analysis of OLN and impurities

The method linearity was evaluated from 50µg/ml to 320µg/ml for OLN and from 0.05/0.1µg/ml to 1.0µg/ml for impurities. An example chromatogram of linear experiment was presented in Fig. 17.

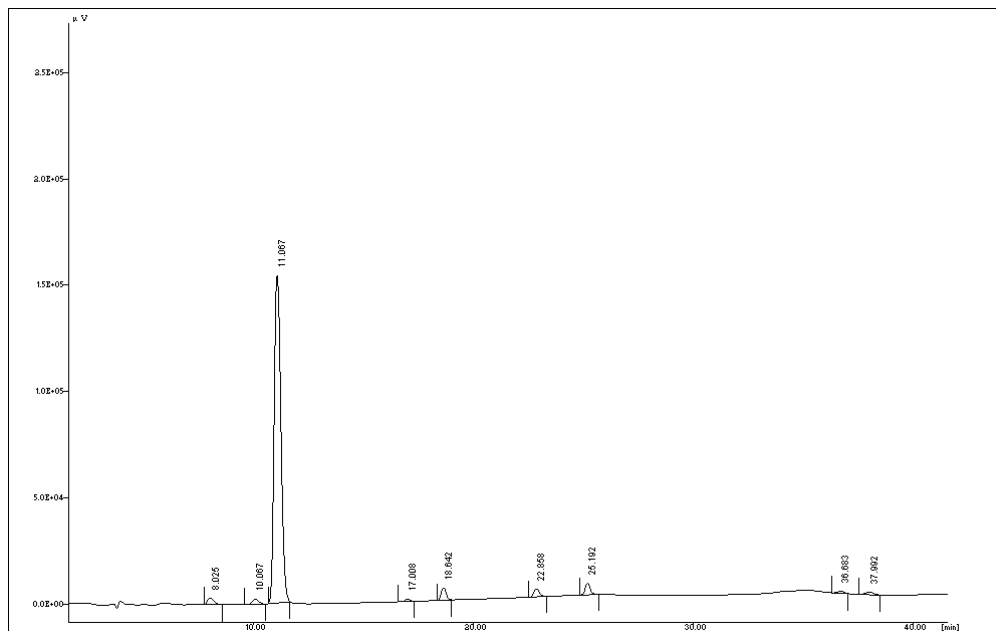

**Fig. 17** A chromatogram of linear experiment (OLN: 50µg/ml, each impurity: 1.0µg/ml)

The linear equation of each impurity was established between the concentration and peak area, where y represented the concentration and x represented peak area. The results were listed in Table 5.

**Table 5** Linear data for OLN and impurities

| Compounds                     | Linear analysis                             |
|-------------------------------|---------------------------------------------|
| Imp-1<br>(0.05µg/ml~1.0µg/ml) | <br>$y = 41524x - 344.6$<br>$R^2 = 0.9996$  |
| Imp-2<br>(0.05µg/ml~1.0µg/ml) | <br>$y = 32342x - 295.64$<br>$R^2 = 0.9997$ |

OLN  
(50µg/ml~320µg/ml)

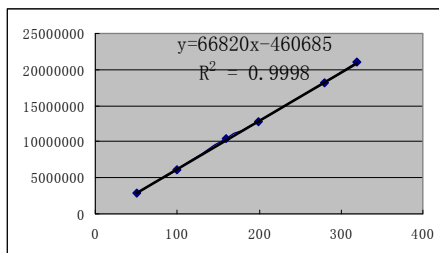

Imp-3  
(0.05µg/ml~1.0µg/ml)

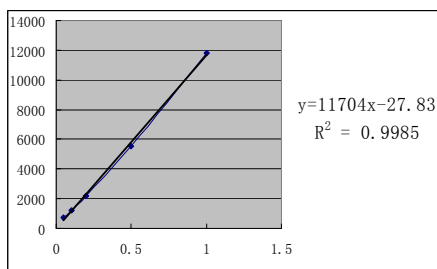

Imp-4  
(0.05µg/ml~1.0µg/ml)

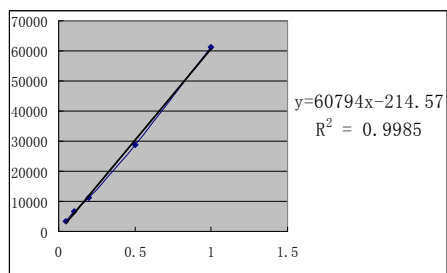

Imp-5  
(0.1µg/ml~1.0µg/ml)

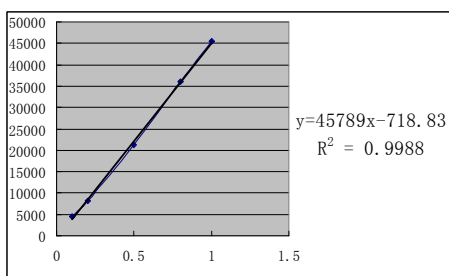

Imp-6  
(0.1µg/ml~1.0µg/ml)

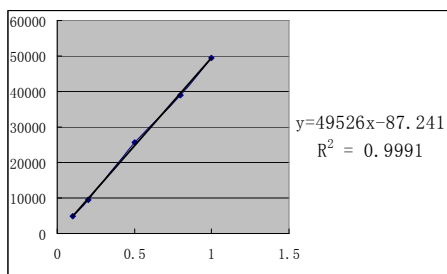



---

Imp-7  
(0.05 µg/ml~1.0 µg/ml)

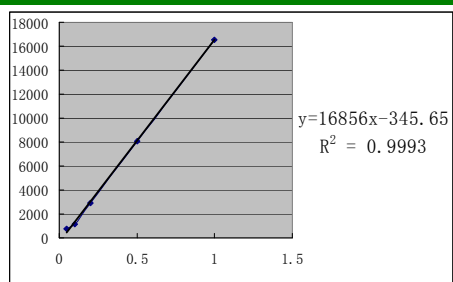

Imp-8  
(0.1 µg/ml~1.0 µg/ml)

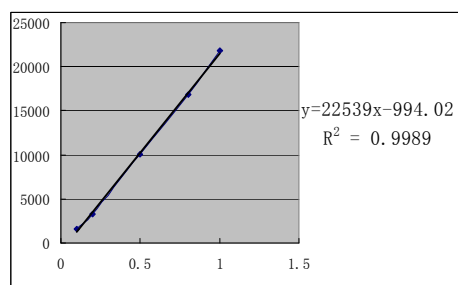

---

## 5. References

- 1 T. Poornachander, K. Ramesh and B. Chandrasekhar. ARKIVOC, 2008, **11**, 195-201.
- 2 K. Jiban, F. Chakrabarti and M. Terrence. US: 5229382, 1993.
